# Supplementary material for: School-level electronic cigarette use prevalence and student-level tobacco use intention and behaviours
Source: PubMed Central journal article supplement (PMC6368577; doi:10.1038/s41598-018-38266-z), 2019-02-08
Supplement: 41598_2018_38266_MOESM1_ESM.pdf [file 41598_2018_38266_MOESM1_ESM.pdf]

## **School-level electronic cigarette use prevalence and student-level tobacco use intention and behaviours**

Jianjiu Chen<sup>1</sup>, MPhil; Sai Yin Ho<sup>1\*</sup>, PhD; Lok Tung Leung<sup>1</sup>, MPhil; Man Ping Wang<sup>2</sup>, PhD; Tai Hing Lam<sup>1</sup>, MD

**Affiliations:** <sup>1</sup>School of Public Health, University of Hong Kong, Hong Kong Special Administrative Region, People's Republic of China; <sup>2</sup>School of Nursing, University of Hong Kong, Hong Kong Special Administrative Region, People's Republic of China

School-level prevalence of e-cigarette use susceptibility  
in never e-cigarette users (%)

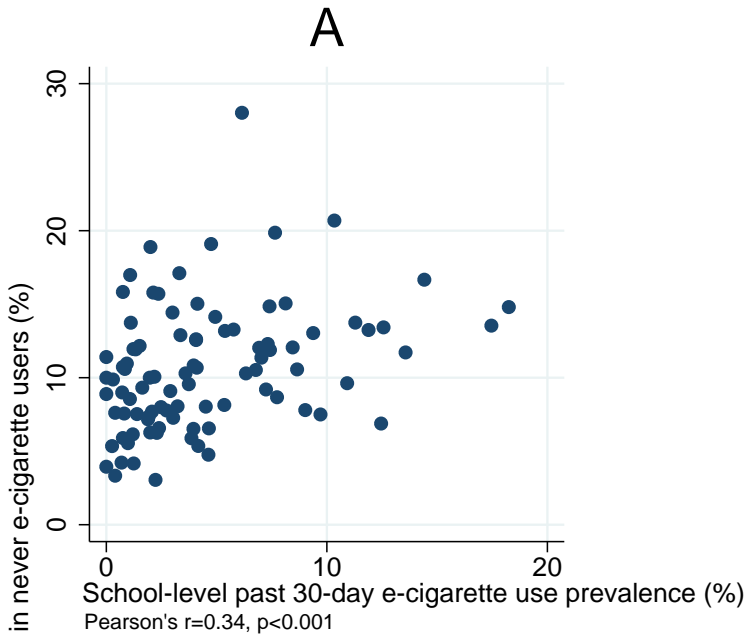

School-level prevalence of cigarette smoking susceptibility  
in never cigarette smokers (%)

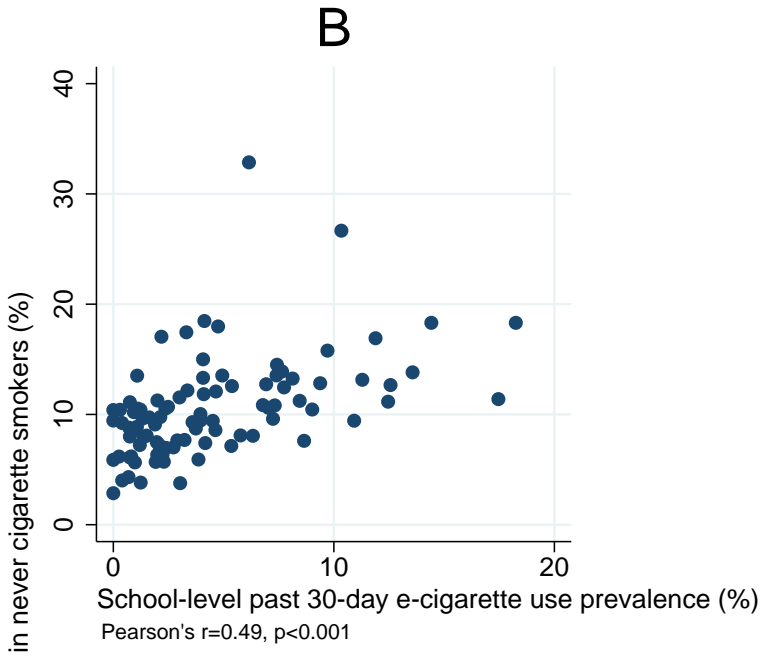

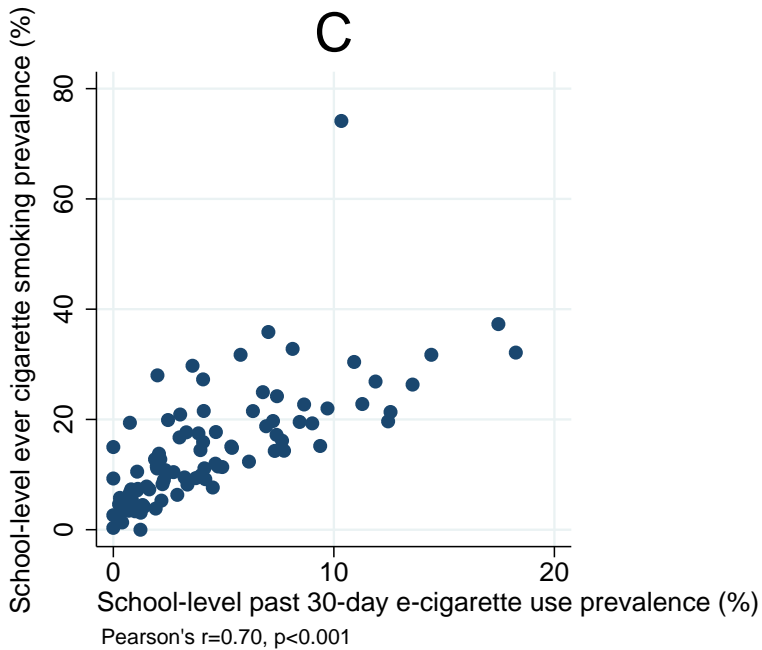

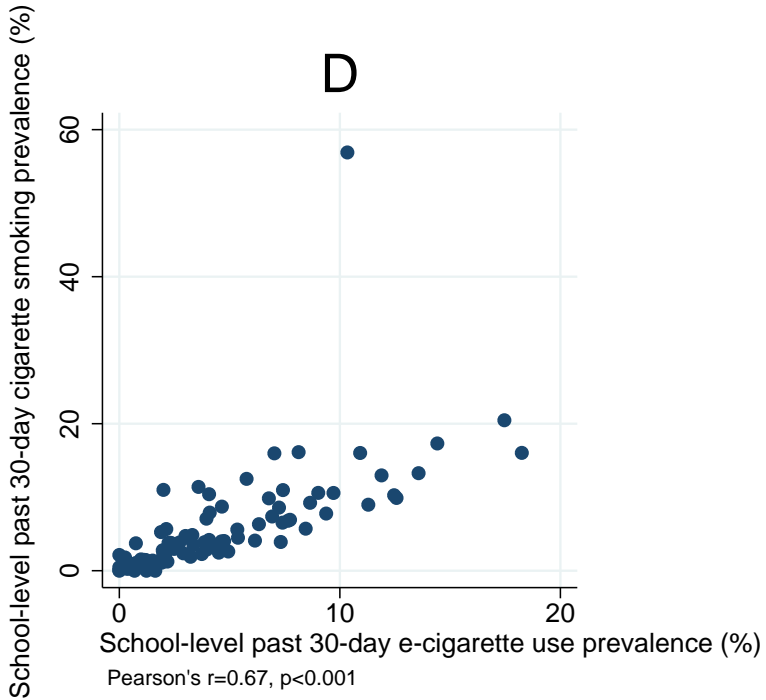

E

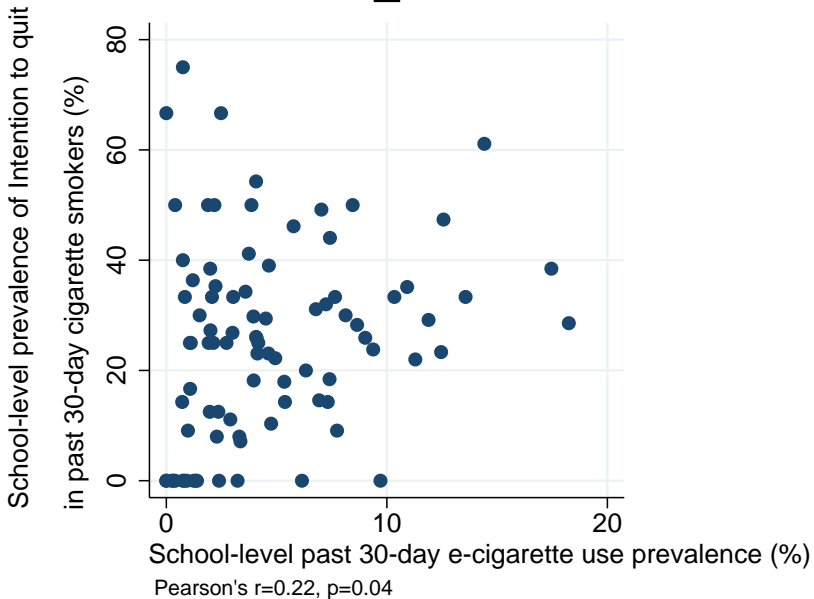

**Supplementary Figure 1 (A-E). Correlation of school-level past 30-day e-cigarette use prevalence with school-level prevalence of other intention and behaviour indicators related to tobacco use**

**Supplementary Table 1. Association of school-level past 30-day e-cigarette use prevalence with student-level alcohol drinking**

|                         |                                   | School-level past 30-day e-cigarette use prevalence |                      |                      |                              |
|-------------------------|-----------------------------------|-----------------------------------------------------|----------------------|----------------------|------------------------------|
|                         |                                   | Low <sup>a</sup>                                    | Medium <sup>a</sup>  | High <sup>a</sup>    | Per 1% increase <sup>b</sup> |
| <b>Monthly drinking</b> | <b>CORs (95% CIs)</b>             | 1                                                   | 1.39 (1.20-1.61) *** | 1.66 (1.43-1.93) *** | 1.05 (1.04,1.07) ***         |
|                         | <b>AORs (95% CIs)<sup>c</sup></b> | 1                                                   | 1.00 (0.88-1.15)     | 0.88 (0.74-1.05)     | 0.98 (0.96,1.00) *           |
| <b>Weekly drinking</b>  | <b>CORs (95% CIs)</b>             | 1                                                   | 1.95 (1.57-2.41) *** | 2.84 (2.29-3.51) *** | 1.11 (1.09,1.13) ***         |
|                         | <b>AORs (95% CIs)<sup>c</sup></b> | 1                                                   | 1.15 (0.96-1.37)     | 0.98 (0.79-1.22)     | 1.00 (0.97,1.02)             |
| <b>Daily drinking</b>   | <b>CORs (95% CIs)</b>             | 1                                                   | 1.88 (1.22-2.91) **  | 3.62 (2.38-5.51) *** | 1.14 (1.09,1.18) ***         |
|                         | <b>AORs (95% CIs)<sup>c</sup></b> | 1                                                   | 0.93 (0.61-1.40)     | 0.86 (0.53-1.39)     | 0.99 (0.94,1.04)             |

\*P < 0.05; \*\*P < 0.01; \*\*\*P < 0.001.

CORs=crude odds ratios; AORs=adjusted odds ratios.

<sup>a</sup> Low: 0-1.99%; medium: 2.00-4.94%; high: 5.35-18.25%.

<sup>b</sup> Per 1% increase was per unit increase in school-level past 30-day e-cigarette use prevalence (continuous; range 0-18.25).

<sup>c</sup> With adjustment of age, sex, perceived family affluence, school-level past 30-day cigarette smoking prevalence (continuous), e-cigarette use status, and cigarette smoking status.



**Supplementary Table 2. Association of school-level ever e-cigarette use prevalence with student-level e-cigarette use and cigarette smoking susceptibility**

|                                                               |                             | School-level ever e-cigarette use prevalence |                      |                      |                              |
|---------------------------------------------------------------|-----------------------------|----------------------------------------------|----------------------|----------------------|------------------------------|
|                                                               |                             | Low <sup>a</sup>                             | Medium <sup>a</sup>  | High <sup>a</sup>    | Per 1% increase <sup>b</sup> |
| E-cigarette use susceptibility (in never e-cigarette users)   | CORs (95% CIs)              | 1                                            | 1.31 (1.07-1.61) **  | 1.65 (1.34-2.04) *** | 1.03 (1.02-1.04) ***         |
|                                                               | AORs (95% CIs) <sup>c</sup> | 1                                            | 1.27 (1.02-1.58) *   | 1.58 (1.20-2.08) **  | 1.05 (1.03-1.07) ***         |
| Cigarette smoking susceptibility (in never cigarette smokers) | CORs (95% CIs)              | 1                                            | 1.42 (1.18-1.71) *** | 1.80 (1.49-2.18) *** | 1.04 (1.02-1.05) ***         |
|                                                               | AORs (95% CIs) <sup>d</sup> | 1                                            | 1.26 (1.02-1.54) *   | 1.42 (1.09-1.85) *   | 1.04 (1.02-1.06) ***         |

\*P < 0.05; \*\*P < 0.01; \*\*\*P < 0.001.

CORs=crude odds ratios; AORs=adjusted odds ratios.

<sup>a</sup> Low: 0-4.88%; medium: 5.11-13.56%; high: 13.59-50.00%.

<sup>b</sup> Per 1% increase was per unit increase in school-level ever e-cigarette use prevalence (continuous; range 0-50.00).

<sup>c</sup> With adjustment of age, sex, perceived family affluence, school-level past 30-day cigarette smoking prevalence (continuous), and cigarette smoking status.

<sup>d</sup> With adjustment of age, sex, perceived family affluence, school-level past 30-day cigarette smoking prevalence (continuous), and e-cigarette use status.

**Supplementary Table 3. Association of school-level ever e-cigarette use prevalence with student-level cigarette smoking and intention to quit**

|                                                      |                             | School-level ever e-cigarette use prevalence |                      |                        |                              |
|------------------------------------------------------|-----------------------------|----------------------------------------------|----------------------|------------------------|------------------------------|
|                                                      |                             | Low <sup>a</sup>                             | Medium <sup>a</sup>  | High <sup>a</sup>      | Per 1% increase <sup>b</sup> |
| Ever cigarette smoking                               | CORs (95% CIs)              | 1                                            | 3.11 (2.35-4.12) *** | 5.91 (4.46-7.83) ***   | 1.10 (1.08-1.11) ***         |
|                                                      | AORs (95% CIs) <sup>c</sup> | 1                                            | 2.01 (1.54-2.62) *** | 3.08 (2.36-4.03) ***   | 1.06 (1.05-1.08) ***         |
| Past 30-day cigarette smoking                        | CORs (95% CIs)              | 1                                            | 4.52 (3.16-6.47) *** | 10.85 (7.59-15.50) *** | 1.12 (1.10-1.14) ***         |
|                                                      | AORs (95% CIs) <sup>c</sup> | 1                                            | 2.19 (1.54-3.11) *** | 3.48 (2.44-4.95) ***   | 1.06 (1.05-1.08) ***         |
| Intention to quit (in past 30-day cigarette smokers) | CORs (95% CIs)              | 1                                            | 1.50 (0.87-2.58)     | 1.84 (1.09-3.13) *     | 1.03 (1.01-1.05) **          |
|                                                      | AORs (95% CIs) <sup>d</sup> | 1                                            | 1.36 (0.78-2.38)     | 1.60 (0.87-2.91)       | 1.03 (0.99-1.07)             |

\*P < 0.05; \*\*P < 0.01; \*\*\*P < 0.001.

CORs=crude odds ratios; AORs=adjusted odds ratios.

<sup>a</sup> Low: 0-4.88%; medium: 5.11-13.56%; high: 13.59-50.00%.

<sup>b</sup> Per 1% increase was per unit increase in school-level ever e-cigarette use prevalence (continuous; range 0-50.00).

<sup>c</sup> With adjustment of age, sex, perceived family affluence, and e-cigarette use status.

<sup>d</sup> With adjustment of age, sex, perceived family affluence, school-level past 30-day cigarette smoking prevalence (continuous), and e-cigarette use status.

**Supplementary Table 4. Association of school-level ever e-cigarette use prevalence with student-level past 30-day NCNE tobacco product use<sup>a</sup>**

| NCNE tobacco products (%) <sup>b</sup> |                                   | School-level ever e-cigarette use prevalence |                      |                       |                              |
|----------------------------------------|-----------------------------------|----------------------------------------------|----------------------|-----------------------|------------------------------|
|                                        |                                   | Low <sup>c</sup>                             | Medium <sup>c</sup>  | High <sup>c</sup>     | Per 1% increase <sup>d</sup> |
| <b>Waterpipe</b>                       | <b>CORs (95% CIs)</b>             | 1                                            | 4.11 (2.14-7.90) *** | 5.77 (3.00-11.12) *** | 1.14 (1.09-1.19) ***         |
|                                        | <b>AORs (95% CIs)<sup>e</sup></b> | 1                                            | 1.84 (0.81-4.16)     | 1.67 (0.63-4.43)      | 1.05 (0.97-1.13)             |
| <b>Chewing tobacco</b>                 | <b>CORs (95% CIs)</b>             | 1                                            | 2.44 (0.65,9.15)     | 9.16 (2.77-30.26) *** | 1.17 (1.06-1.28) **          |
|                                        | <b>AORs (95% CIs)<sup>e</sup></b> | 1                                            | 0.78 (0.19-3.24)     | 1.83 (0.41,8.26)      | 1.03 (0.92-1.16)             |
| <b>Cigar</b>                           | <b>CORs (95% CIs)</b>             | 1                                            | 3.20 (1.23,8.36) *   | 7.24 (2.87-18.26) *** | 1.15 (1.06-1.24) ***         |
|                                        | <b>AORs (95% CIs)<sup>e</sup></b> | 1                                            | 0.77 (0.26-2.28)     | 1.06 (0.32-3.56)      | 0.96 (0.88-1.06)             |
| <b>Snus</b>                            | <b>CORs (95% CIs)</b>             | 1                                            | 3.20 (1.33-7.73) **  | 5.38 (2.27-12.73) *** | 1.11 (1.05-1.17) ***         |
|                                        | <b>AORs (95% CIs)<sup>e</sup></b> | 1                                            | 1.16 (0.40-3.40)     | 1.15 (0.32-4.13)      | 0.95 (0.86-1.05)             |
| <b>Smoking pipe</b>                    | <b>CORs (95% CIs)</b>             | 1                                            | 1.45 (0.40-5.24)     | 6.09 (1.97-18.84) **  | 1.12 (1.02-1.24) *           |
|                                        | <b>AORs (95% CIs)<sup>e</sup></b> | 1                                            | 0.43 (0.09-2.11)     | 1.05 (0.19-5.63)      | 0.95 (0.82-1.10)             |
| <b>Other tobacco products</b>          | <b>CORs (95% CIs)</b>             | 1                                            | 4.21 (1.56-11.38) ** | 5.20 (1.90-14.26) **  | 1.11 (1.03-1.20) **          |
|                                        | <b>AORs (95% CIs)<sup>e</sup></b> | 1                                            | 2.22 (0.53,9.33)     | 1.81 (0.31-10.44)     | 1.02 (0.88-1.17)             |

\*P < 0.05; \*\*P < 0.01; \*\*\*P < 0.001.

CORs=crude odds ratios; AORs=adjusted odds ratios.

<sup>a</sup> NCNE=Non-cigarette non-e-cigarette. The analysis was conducted in a subsample (10923 students; 30 schools) of the whole sample (40202 students; 92 schools). Only the subsample had data on NCNE tobacco product use.

<sup>b</sup> Proportion of product users in the subsample.

<sup>c</sup> Low: 0-5.12%; medium: 5.28-11.47%; high: 12.41-21.35%.

<sup>d</sup> Per 1% increase was per unit increase in school-level ever e-cigarette use prevalence (continuous; range 0-21.35).

<sup>e</sup> With adjustment of age, sex, perceived family affluence, school-level past 30-day cigarette smoking prevalence (continuous), e-cigarette use status, and cigarette smoking status.
